# Supplementary material for: Genomic, Antimicrobial, and Aphicidal Traits of Bacillus velezensis ATR2, and Its Biocontrol Potential against Ginger Rhizome Rot Disease Caused by Bacillus pumilus
Source: MDPI journal article supplement (doi:10.3390/microorganisms10010063), 2021-12-29
Supplement: s1 [file s1]

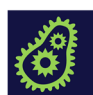

Article

# Genomic, Antimicrobial and Aphicidal Traits of *Bacillus velezensis* ATR2, and Its Biocontrol Potential against Ginger Rhizome Rot Disease Caused by *Bacillus pumilus*

Lei Qin Liang <sup>1,2</sup>, Yajuan Fu <sup>1,2</sup>, Sangsang Deng <sup>1,2</sup>, Yan Wu <sup>1</sup> and Meiyang Gao <sup>1,\*</sup>

<sup>1</sup> Wuhan Institute of Virology, Chinese Academy of Sciences, Wuhan, 430071, P. R. China; wuyan81@wh.iov.cn; mygao@wh.iov.cn

<sup>2</sup> University of Chinese Academy of Sciences, Beijing, 100039, P. R. China; liangleiqin@163.com; fuyajuann@163.com; dongsangsang@163.com

\* Correspondence: mygao@wh.iov.cn

**Table S1.** Physiological and biochemical characteristics of strain ATR2.

| Characteristic                | Strain ATR2    |
|-------------------------------|----------------|
| Pigmentation                  | Opaque         |
| Anaerobic growth              | – <sup>a</sup> |
| Oxidase                       | +              |
| Hydrolysis of starch          | +              |
| Acid production from:         |                |
| D-Arabinose <sup>b</sup>      | –              |
| L-Arabinose                   | +              |
| D-Ribose                      | +              |
| D-Xylose                      | +              |
| L-Xylose                      | –              |
| D-Adonitol                    | –              |
| D-Galactose                   | –              |
| L-Sorbose                     | –              |
| L-Rhamnose                    | –              |
| Dulcitol                      | –              |
| Sorbitol                      | +              |
| Methyl- $\alpha$ -D-glucoside | +              |
| N-Acetylglucosamine           | –              |
| Amygdalin                     | –              |
| D-Lactose                     | +              |
| D-Melibiose                   | +              |
| D-Trehalose                   | +              |
| Inulin                        | –              |
| D-Raffinose                   | +              |
| Glycogen                      | +              |
| Xylitol                       | –              |

**Citation:** Liang, L.; Fu, Y.; Deng, S.; Wu, Y.; Gao, M. Genomic, Antimicrobial, and Aphicidal Traits of *Bacillus velezensis* ATR2, and Its Biocontrol Potential against Ginger Rhizome Rot Disease Caused by *Bacillus pumilus*.

*Microorganisms* **2022**, *10*, x.

<https://doi.org/10.3390/microorganisms10010063>

Academic Editors: Annamaria Bevivino and Maria Maddalena Del Gallo

Received: 22 November 2021

Accepted: 23 December 2021

Published: 29 December 2021

**Publisher's Note:** MDPI stays neutral with regard to jurisdictional claims in published maps and institutional affiliations.

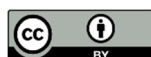

**Copyright:** © 2021 by the authors. Licensee MDPI, Basel, Switzerland. This article is an open access article distributed under the terms and conditions of the Creative Commons Attribution (CC BY) license (<https://creativecommons.org/licenses/by/4.0/>).

|               |   |
|---------------|---|
| D-Gentiobiose | - |
| D-Turanose    | + |
| D-Lyxose      | - |
| D-Tagatose    | - |
| D-Fucose      | - |
| L-Fucose      | - |
| D-Arabitol    | - |
| L-Arabitol    | - |

<sup>a</sup> + and – represented positive reaction and negative reaction, respectively.

<sup>b</sup> Data were obtained using API 50 CHB test strips.

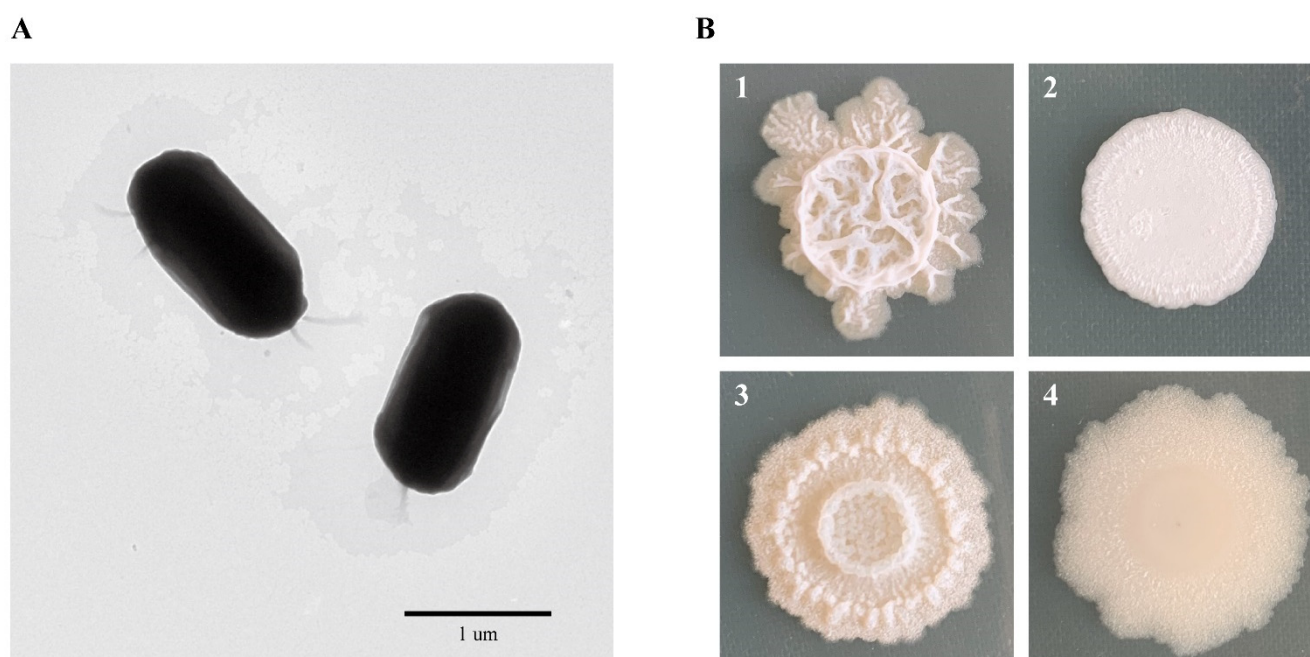

**Figure S1.** Bacterial cell and colony morphology of strain ATR2. A, The cell morphology of strain ATR2 under transmission electron microscope (TEM). B, The colony morphology of strain ATR2 (1), *B. velezensis* FZB42 (2), *B. amyloliquefaciens* DSM 7<sup>T</sup> (3) and *B. subtilis* 168<sup>T</sup> (4).

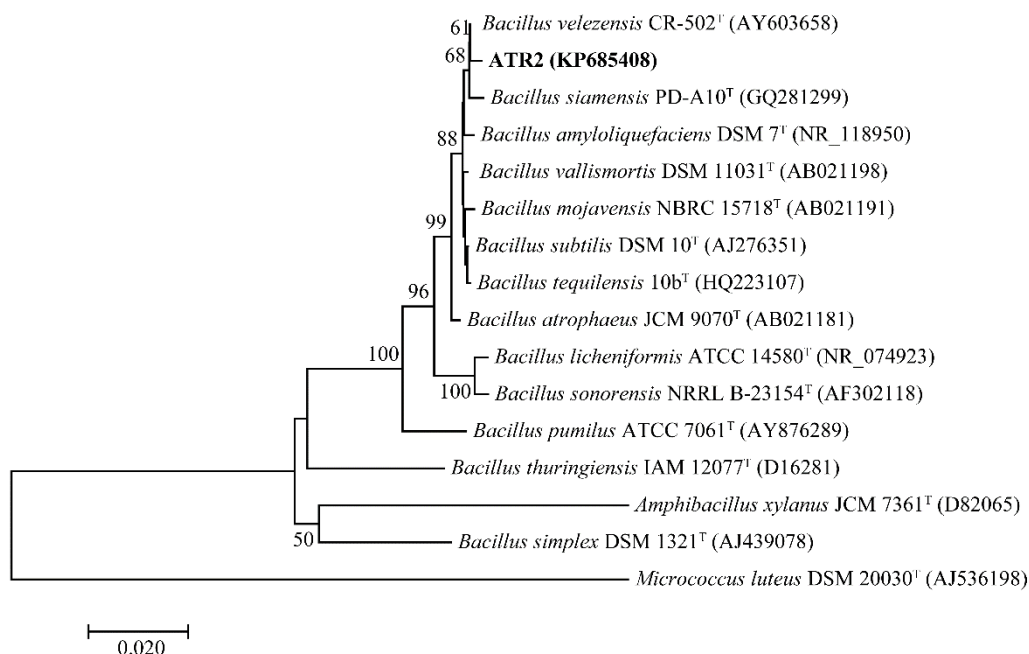

**Figure S2.** Phylogenetic tree constructed with 16S rRNA sequences using the neighbor-joining method and bootstrap analysis (1,000 replicates) in MEGA. Strain ATR2 was highlighted in bold. Numbers in parentheses represented the GenBank accession numbers. Branch support with value of 50 or more was indicated at the branch nodes. The sequence from *Micrococcus luteus* DSM20030<sup>T</sup> (AJ536198) was used as the outgroup. The scale bar represented 0.02 substitutions per nucleotide position.

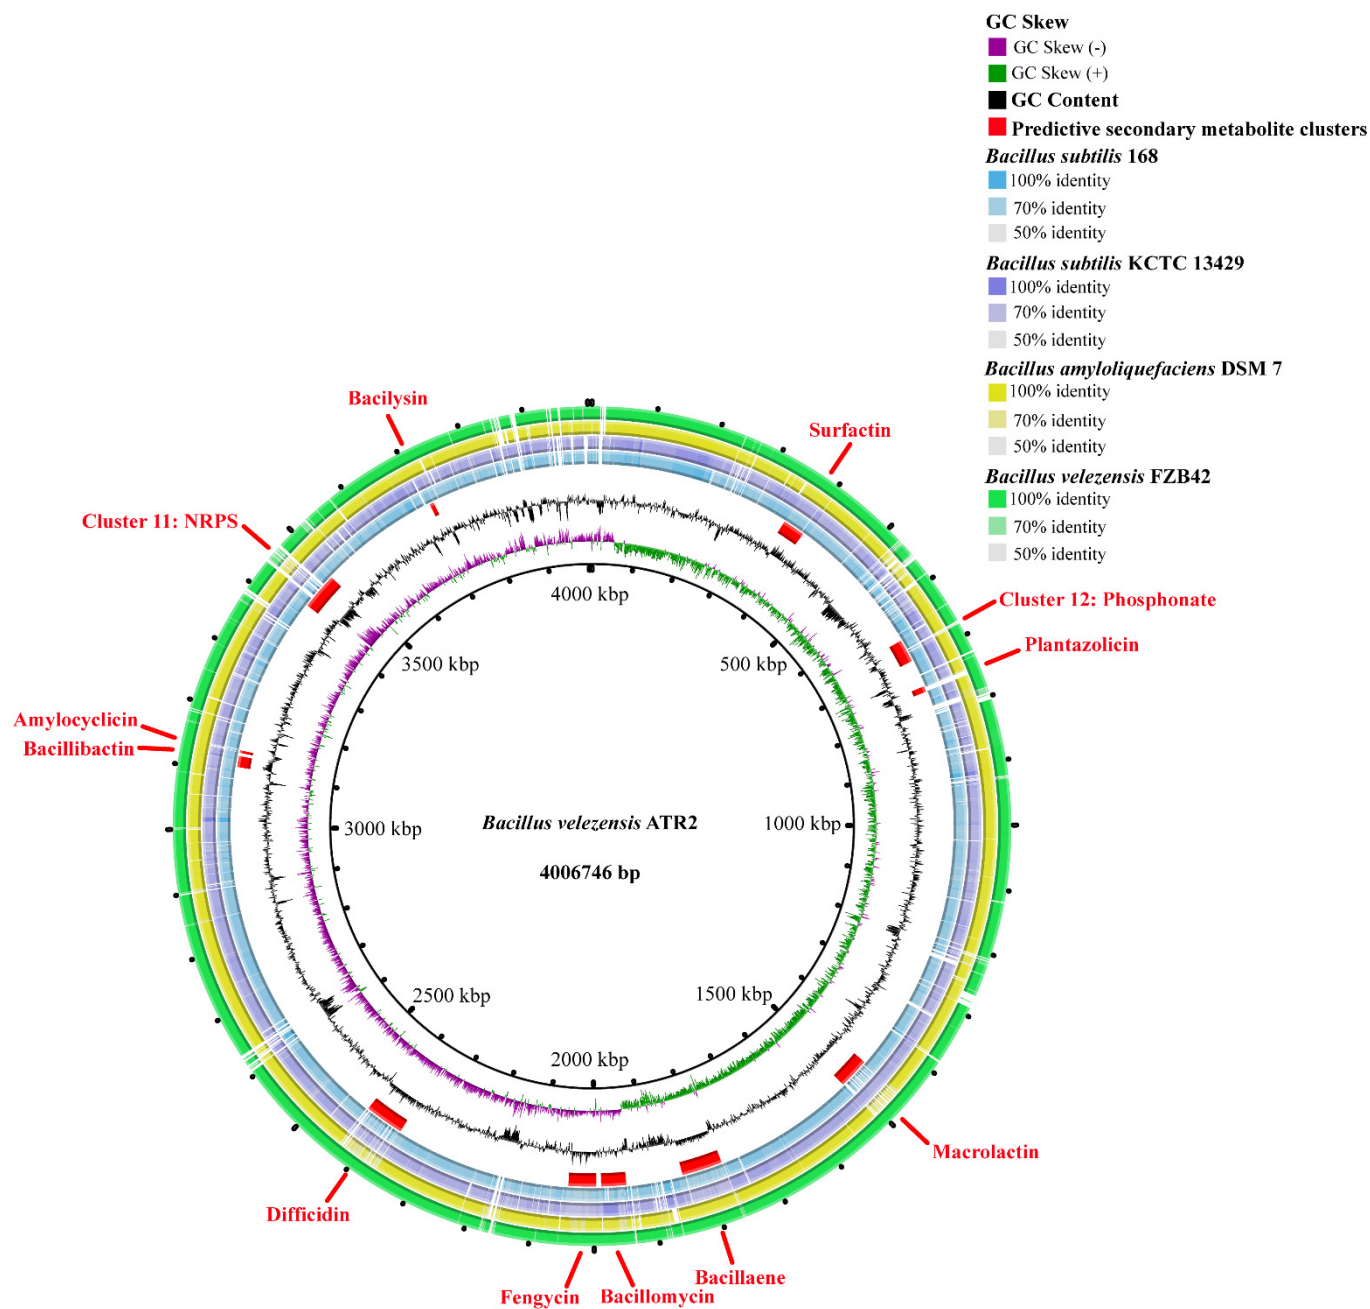

**Figure S3.** Genomic comparison of the *B. velezensis* ATR2 against closely related *Bacillus* strains. Circles displayed from the inner to outside: (1) GC Skew; (2) GC Content; (3) Predictive secondary metabolite clusters; (4, 5, 6, 7) BLAST comparison of *B. velezensis* ATR2 genome with *Bacillus* strains, *B. subtilis* 168<sup>T</sup>, *B. subtilis* KCTC 13429<sup>T</sup>, *B. amyloliquefaciens* DSM7<sup>T</sup> and *B. velezensis* FZB42, respectively.

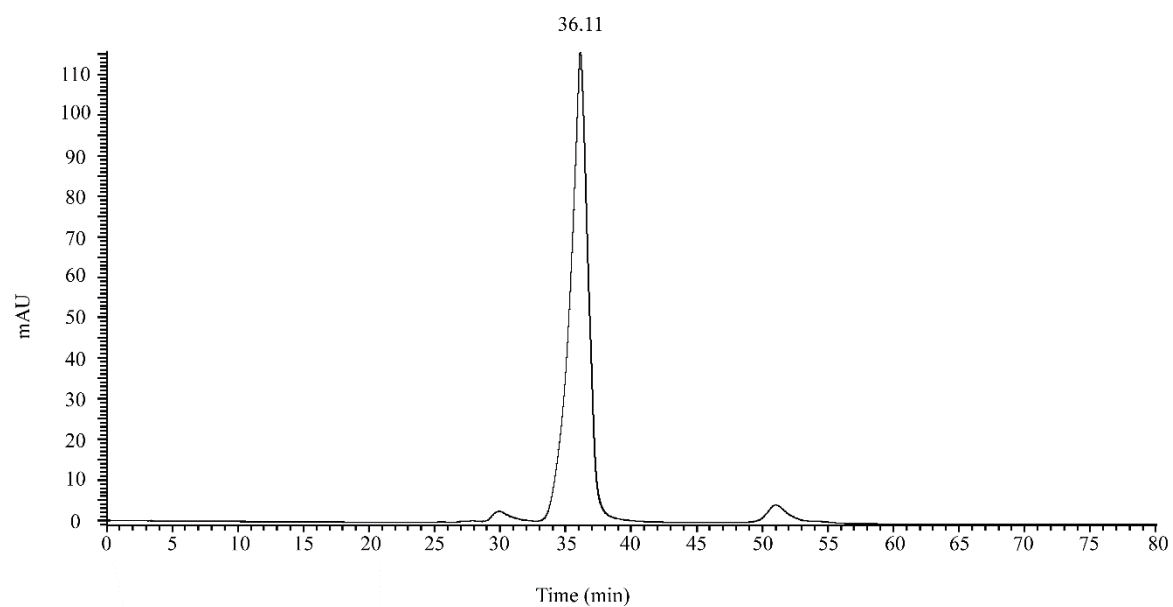

**Figure S4.** HPLC analysis of the purified antagonistic compound from *B. velezensis* ATR2 against *B. pumilus* GR8.
